# Supplementary material for: ssNMRlib: a comprehensive library and tool box for acquisition of solid-state nuclear magnetic resonance experiments on Bruker spectrometers
Source: PubMed Central journal article supplement (PMC10500710; doi:10.5194/mr-1-331-2020), 2020-12-23
Supplement: mr-1-331-supplement.pdf [file mr-1-331-supplement.pdf]

Supplement of Magn. Reson., 1, 331–345, 2020  
<https://doi.org/10.5194/mr-1-331-2020-supplement>  
© Author(s) 2020. This work is distributed under  
the Creative Commons Attribution 4.0 License.

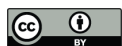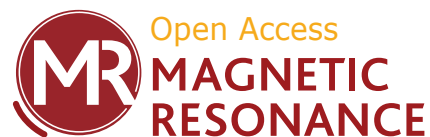

*Supplement of*

## **ssNMRlib: a comprehensive library and tool box for acquisition of solid-state nuclear magnetic resonance experiments on Bruker spectrometers**

**Alicia Vallet et al.**

*Correspondence to:* Alicia Vallet ([alicia.vallet@ibs.fr](mailto:alicia.vallet@ibs.fr)) and Paul Schanda ([paul.schanda@ist.ac.at](mailto:paul.schanda@ist.ac.at))

The copyright of individual parts of the supplement might differ from the CC BY 4.0 License.

## Listing S1 : parameter naming convention in ssNMRlib

### General naming conventions for CPs, plw, spw, cnst

CP power levels are entered in kHz and are generally assigned to the three channels as:

|                       |            |                                  |
|-----------------------|------------|----------------------------------|
| 30-39 : 13C           | H-C CP : 1 | Examples :                       |
| 40-49 : 1H            | H-N CP : 2 | 13C RF field for HC CP → cnst 31 |
| 50-56 : 15N           | N-CO : 3   | 1H RF field for HC CP → cnst 41  |
| 57-63 : Midpoint ramp | N-CA : 4   |                                  |

### Hard Pulses

#### if 1H detection

p1 : H 90 degree pulse (us) @ plw1  
p2 : C 90 degree pulse (us) @ plw2  
p3 : N 90 degree pulse (us) @ plw3  
p4 : 2H 90 degree pulse (us) @plw4

#### if 15N detection

p1 : N 90 degree pulse (us) @ plw1  
p2 : H 90 degree pulse (us) @ plw2  
p3 : C 90 degree pulse (us) @ plw3

#### if 13C detection

p1 : C 90 degree pulse (us) @ plw1  
p2 : H 90 degree pulse (us) @ plw2  
p3 : N 90 degree pulse (us) @ plw3  
p4 : 2H 90 degree pulse (us) @ plw4

### CP constants

#### HN CP

cnst 42 : RF field on 1H (kHz)  
cnst 52 : RF field on 15N (kHz)  
cnst 62 : Midpoint of the ramp  
spnam 42 : File name for the ramp  
p 45 : CP duration (us)

#### N-CO CP

cnst 33 : RF field on 13C (kHz)  
cnst 43 : RF field on 1H for decoupling (kHz)  
cnst 53 : RF field on 15N (kHz)  
cnst 63 : Midpoint of the ramp  
spnam 53 : File name for the ramp  
p 53 : CP duration (us)

#### Simultaneous HCN CP

cnst 31 : RF field on 13C (kHz)  
cnst 41 : RF field on 1H (kHz)  
cnst 51 : RF field on 15N (kHz)  
cnst 61 : Midpoint of the ramp  
spnam 41 : File name for the ramp  
p 43 : CP duration (us)

#### HC/HCA/HCO CP

cnst 31 : RF field on 13C (kHz)  
cnst 41 : RF field on 1H (kHz)  
cnst 61 : Midpoint of the ramp  
spnam 41 : File name for the ramp  
p 43 : CP duration (us)

#### N-CA CP

cnst 34 : RF field on 13C (kHz)  
cnst 44 : RF field on 1H for decoupling  
cnst 54 : RF field on 15N (kHz)  
cnst 60 : Midpoint of the ramp  
spnam 54 : File name for the ramp  
p 35 : CP duration (us)

#### HA-CA CP

cnst 35 : RF field on 13C (kHz)  
cnst 45 : RF field on 1H (kHz)  
cnst 57 : Midpoint of the ramp  
spnam 45 : File name for the ramp  
p 34 : CP duration (us)

## **INEPT**

d 13 : INEPT delay HC (sec)  
d 14 : INEPT delay HN (sec)  
d 15 : INPET delay CA-CB (sec)  
d 16 : INEPT delay CO-CA, CO transverse (sec)  
d 17 : INEPT delay CO-CA, CA transverse (sec)  
d 53 : INEPT delay N-CO (sec)  
d 54 : INEPT delay N-CA (sec)

## **Transfer 13C-13C**

### **13C RFDR**

cnst 20 : Spinning rate (Hz)  
cnst 37 : 13C offset during RFDR  
d 8 : Mixing time  
p 37 : RFDR duration (us)

### **DREAM CA-CB**

cnst 6 : RF field on 1H (kHz)  
cnst 7 : RF of the DREAM (kHz)  
cnst 17 : 13C offset for DREAM  
cnst 59 : Midpoint of the ramp  
p 17 : DREAM duration (us)  
spnam 7 : DREAM ramp

### **TOCSY / DIPSI**

cnst 15 : RF field on 13C (kHz)  
d 15 : Mixing duration (sec)  
cpdprg 8 : Mixing sequence  
pcpd 5 : Pulse length for the mixing sequence

## **Transfer 1H-1H**

### **Bass-SD**

cnst 48 : 1H carrier during Bass-SD  
cnst 49 : RF Bass-SD at midpoint (kHz)  
cnst 59 : Midpoint of the Bass-SD shape  
spnam 49 : Bass-SD element  
p 49 : Bass-SD duration (us)  
d 8 : z-filter delay (sec)

### **Z-mix**

d 8 : Z-mix delay (sec)

## **Transfer 15N-13C**

### **TEDOR**

L1 : Loop number for TEDOR experiment

### **DARR**

cnst 5 : RF field on 1H (kHz)  
cnst 20 : Spinning rate (Hz)  
d 5 : Mixing time (ms)  
d 22 : Rotation period

### **CP BSH CO-CA**

cnst 38 : RF field for the CO-CA (kHz)  
cnst 58 : Midpoint of the ramp  
p 38 : CP duration (us)  
p 39 : Trim duration before BSH (us)  
p 40 : Trim duration after BSH (us)  
spnam 38 : BSH-CP ramp

### **Alfresco**

p 50 : Alfresco chirp pulse duration (us)  
cnst 50 : Alfresco RF power (kHz)  
spnam 49 : chirp pulse file name  
spnam 50 : chirp pulse file name  
l4 : mixing loop

### **1H RFDR**

cnst 20 : Spinning rate (Hz)  
cnst 37 : 1H offset during RFDR  
d 8 : Mixing time (sec)  
p 37 : RFDR duration (us)  
L0 : RFDR loop

## **Transfer 15N-15N**

### **PDS**

d 5 : PDS mixing time (sec)

## Dynamics

### REDOR

p 18 : 1H pulse 180° (us)  
p 19 : 13C pulse 180° (us)  
cnst 20 : Spinning rate (Hz)  
d 7 : Redor shift delay (sec)  
L0=0 : Redor loop (2 rotor period min)  
L1=0 : Reference

### T2

d 25 : T2 delay

### CEST

cnst 17 : 1H decoupling (kHz) @ plw17  
cnst 27 : 15N RF field (Hz)  
cnst 29 : Set to 0 for reference experiment  
p 17 : Decoupling pulse length (us)  
d 31 : CEST delay (sec)  
cpdprg 5 : 1H decoupling sequence  
cpdprg 6 : CEST 15N sequence

## Selective 13C pulses

spnam 10 : EBURP2 on-resonance CO  
spnam 11 : EBURP2-TR on-resonance CO  
spnam 13 : ISNOB 2 off-resonance CO  
spnam 14 : REBURP on-resonance CA  
spnam 15 : REBURP on-resonance CA-CB  
spnam 16 : EBURP2 off-resonance CO  
spnam 17 : EBUR2P on-resonance CA  
spnam 18 : ISNOB2 off-resonance CA  
spnam 19 : REBURP on-resonance CO

according to p11 for the pulse duration  
according to p12 for the pulse duration  
according to p13 for the pulse duration  
according to p14 for the pulse duration  
according to p15 for the pulse duration  
according to p16 for the pulse duration  
according to p17 for the pulse duration  
according to p18 for the pulse duration  
according to p19 for the pulse duration

## Decoupling

### 13C decoupling during 1H detection

cpdprg 1 : sequence used for the 13C decoupling during 1H detection  
pcpd 1 : pulse length in decoupling sequence (us)  
cnst 11 : 13C decoupling power (kHz) @ plw11

### 1H decoupling during 13C/15N evolution/detection

cpdprg 2 : sequence used for the 1H decoupling during evolution/detection time  
pcpd 2 : pulse length in decoupling sequence (us)  
cnst 12 : 1H decoupling power (kHz) @ plw12

### 15N decoupling during 1H detection

cpdprg 3 : sequence used for the 15N decoupling during 1H detection  
pcpd 3 : pulse length in decoupling sequence (us)  
cnst 13 : 15N decoupling power (kHz) @ plw13

### R1rho

cnst 25 : R1rho field strength (kHz)  
p 18 : heat compensation pulse  
p 25 : spinlock  
p 26 : 13C/15N degree pulse (us)  
d 24 : R1rho max delay

### T1

d 25 : T1 delay (sec)

### EXSY

d 31 : EXSY mixing time (sec)

## 2H decoupling

cpdprg 5 : sequence used for the 15N decoupling during 1H detection  
pcpd 5 : pulse length in decoupling sequence (us)  
cnst 14 : 2H decoupling power (kHz) @ plw14

## Solvent suppression

cnst 24 : 1H RF field for solvent suppression (kHz)  
d 30 : duration for the solvent suppression (sec)  
cpdprg 4 : decoupling sequence  
pcpd 7 : pulse length for the solvent suppression (us)

## Other constants

cnst 1 : 13C reference RF field (kHz), from p 21 (for calculation)  
cnst 2 : 1H reference RF field (kHz), from p 22 (for calculation)  
cnst 3 : 15N reference RF field (kHz), from p 23 (for calculation)  
cnst 4 : 2H reference RF field (kHz), from p 24 (for calculation)  
cnst 10 : Multiplier for  $acqt=cnst10*1u$  set to 1  
cnst 15 : Center of CB (39 ppm)  
cnst 16 : Center of CO (175 ppm)  
cnst 17 : Center of CA (54 ppm)  
cnst 18 : Carrier between CA and CO (100 ppm)  
cnst 20 : Spinning rate (Hz)

## Other delays

d 20 : rotor period (calculated from cnst 20)  
d 21 : half rotor-period

## Listing S2 : currently implemented experiments

### NMRlib tools

**Template maker** → Implement the current experiment to the library

**Export** → Export the loaded template to a folder for sharing

**Import** → Import an experiment from your folder to your library

**Delete** → Delete the loaded template from the library

### Set-up experiments

KBr

Adamantane

**Set pulse lengths** → Set 90° pulse widths

**Security** → Control your experiment before to launch it

**Remove** → Remove all the best ramp in order to start a new optimization or user default constants

**Recap file** → Create or charge a recap file of your optimizations

**Load your contants** → Load selectively transfer parameters

**Save your pulse program** → Save your pulse program inside your experiment (not compiled version)

### Proteins

#### Proton detection

**Set user default parameters: Water suppression parameters, D1 & RG**

#### Calibrations

##### O1 Calibration

##### Hard Pulse

1H Calibration based on hNH CP experiment

1H Calibration based on hCH CP experiment

15N Calibration based on hNH CP experiment

13C Calibration based on hCH CP experiment

1H Direct calibration

1H Calibration based on hNH INEPT experiment

1H Calibration based on hCH INEPT experiment

15N Calibration based on hNH INEPT experiment

13C Calibration based on hNH INEPT experiment

##### Cross Polarization

CP HN optimization

CP HC optimization

CP HCO optimization

CP HCA optimization

CP HACA optimization

CP NCO optimization  
CP NCA optimization  
CP simultaneous hCH hNH optimization  
BSH CO-CA optimization

### INEPT

hNH  
hCH  
INEPT delay COCA, CO transverse  
INEPT delay COCA, CA transverse

### 1D spectra

Basic 1D experiment  
1H R1

### Hetero 2Ds HN/HC CP/INEPT

#### Experiments without 2H decoupling

hNH CP  
hNH refINEPT  
hCH CP  
hCH refINEPT  
Simultaneous CH and NH CP

#### Experiments with 2H decoupling

hCH CP  
hCH refINEPT  
Simultaneous CH and NH CP

### Backbone assignment

#### 3D Experiments

##### Experiments without 2H decoupling

**hCOcaNH** → HN(i)-N(i)-CO(i)  
Scalar CO-ca  
Scalar CO-ca semi constant-time  
Dipolar CO-ca  
**hCONH** → HN(i)-N(i)-CO(i-1)  
**hCANH** → HN(i)-N(i)-CA(i)  
**hcoCAcoNH** → HN(i)-N(i)-CA(i-1)  
**hCAcoNH** → HN(i)-N(i)-CA(i-1)  
Dipolar CA-co  
**hcaCBcaNH** → HN(i)-N(i)-CB(i)  
**hcaCBacoNH** → HN(i)-N(i)-CB(i-1)  
Scalar ca-co  
Dipolar ca-co  
**hNcocaNH** → HN(i)-N(i)-N(i+1)  
Scalar co-ca  
Dipolar co-ca  
**hNcacoNH** → HN(i)-N(i)-N(i-1)  
Dipolar ca-co

### Experiments with 2H decoupling

**hCOcaNH** → HN(i)-N(i)-CO(i)

Scalar CO-ca

**hcaCBcaNH** → HN(i)-N(i)-CB(i)

**hcaCBacoNH** → HN(i)-N(i)-CB(i-1)

### 4D Experiments

#### Experiments without 2H decoupling

**hCOCANH** → HN(i)-N(i)-CO(i)-CA(i)

Scalar CO-CA

Scalar CO-CA semi constant-time

Scalar CO-CA with double semi constant-time

Dipolar CO-CA

**hCOCAcoNH** → HN(i)-N(i)-CO(i-1)-CA(i-1)

Scalar CO-CA

Scalar CO-CA-co semi constant-time

**hCACONH** → HN(i)-N(i)-CA(i-1)-CO(i-1)

Dipolar CA-CO

**hcaCBcaCONH** → HN(i)-N(i)-CB(i-1)-CO(i-1)

Scalar ca-CO

Scalar ca-CO semi constant-time

Dipolar ca-CO

**hcaCBCANH** → HN(i)-N(i)-CA(i)-CB(i)

**hcaCBCAcoNH** → CB(i-1)-CA(i-1)-N(i)-HN(i)

Scalar CA-co

Scalar CA-co semi constant-time

**hCONCAHA** → CO(i-1)-N(i)-CA(i)-HA(i)

**hNCOcaNH** → N(i+1)-CO(i)-N(i)-HN(i)

Scalar CO-ca

Dipolar CO-ca

**hNcoCANH** → N(i+1)-CA(i)-N(i)-HN(i)

Scalar co-CA

Dipolar co-CA

**HNcocaNH** → HN(i+1)-N(i+1)-N(i)-HN(i)

Scalar co-ca

#### Experiments with 2H decoupling

**hCOCANH** → HN(i)-N(i)-CO(i)-CA(i)

**hcaCBcaCONH** → HN(i)-N(i)-CB(i-1)-CO(i-1)

**hcaCBCANH** → HN(i)-N(i)-CA(i)-CB(i)

**hcaCBCAcoNH** → CB(i-1)-CA(i-1)-N(i)-HN(i)

**hNCOcaNH** → N(i+1)-CO(i)-N(i)-HN(i)

**hNcoCANH** → N(i+1)-CA(i)-N(i)-HN(i)

### Side-chain assignment

#### Experiments without 2H decoupling

hCCH TOCSY

hCCH refINEPT TOCSY



hCCH refINEPT

## Experiment with 2H decoupling

hCCH refINEPT

### Dynamics

#### Experiments without deuterium decoupling

##### Dipolar couplings

hCH REDOR

hNH REDOR

hCH INEPT REDOR

hNH INEPT REDOR

##### Longitudinal Relaxation

R1 hCH  $^{13}\text{C}$   $\rightarrow$  CP

R1 hCONH  $^{13}\text{CO}$   $\rightarrow$  CP

R1 hCANH  $^{15}\text{N}$   $\rightarrow$  CP

R1 hNH  $^{15}\text{N}$   $\rightarrow$  CP

R1 hCH  $^{13}\text{C}$   $\rightarrow$  INEPT

T1 hCH  $^1\text{H}$   $\rightarrow$  CP

T1 hCH  $^1\text{H}$   $\rightarrow$  INEPT

##### Transverse Relaxation

R1rho hCH  $^1\text{H}$   $\rightarrow$  CP

R1rho hCH  $^{13}\text{C}$   $\rightarrow$  CP

R1rho hCONH  $^{13}\text{CO}$   $\rightarrow$  CP

R1rho hCANH  $^{15}\text{N}$   $\rightarrow$  CP

R1rho hNH  $^{15}\text{N}$   $\rightarrow$  CP

T2 hNH  $^1\text{H}$   $\rightarrow$  CP

T2 hCH  $^1\text{H}$   $\rightarrow$  CP

##### Transverse Relaxation

hCH EXSY  $\rightarrow$  CP

hNH EXSY  $\rightarrow$  CP

Simultaneous hNH hCH EXSY  $\rightarrow$  CP

CEST hNH  $\rightarrow$  CP

#### Experiments with deuterium decoupling

hCH EXSY  $\rightarrow$  CP

Simultaneous hCH hNH EXSY  $\rightarrow$  CP

REDOR hCH  $\rightarrow$  CP

R1rho hCH  $\rightarrow$  CP

### Distance Measurements

#### Experiments with deuterium decoupling

HhNH HHRFDR

Simultaneous h(C/N)hh(C/N)H HHRFDR

Simultaneous Hh(C/N)H HHRFDR

Bass-SD HhCH

HhCONH Hzmix  
HhCANH Hzmix

### **Experiments with deuterium decoupling**

Simultaneous h(C/N)hh(C/N)H HHRFDR  
Simultaneous Hh(C/N)H HHRFDR

## **Carbon detection**

### **Set user default parameters: D1 & RG**

#### **Calibrations**

##### **Hard Pulse**

$^{13}\text{C}$  Calibration based on hC CP experiment  
 $^1\text{H}$  Calibration based on hC CP experiment  
 $^{13}\text{C}$  Direct calibration

##### **Cross Polarization**

CP HC optimization  
CP HCO optimization  
CP HCA optimization  
CP NCO optimization  
CP NCA optimization

##### **INEPT**

hC  
NCO INEPT  
NCA INEPT  
CC INEPT

##### **C-C transfer**

CC INEPT  
DREAM  
DARR CO-CX duration  
DARR CA-CO duration  
RFDR CO-CX duration  
RFDR CA-CO duration  
CO-CA BSH CP  
CA-CO BSH CP

#### **1D Experiments**

$^{13}\text{C}$  direct  
CP HC  
INEPT HC  
hNCA → double CP  
hNCO → double CP

## 1D Relaxation Experiments

$^1\text{H T1}$  → via CP or INEPT

$^1\text{H T2}$  → via CP or INEPT

$^{13}\text{C T1}$  → via CP

$^{13}\text{CA T2}$  → via CP

$^{13}\text{CO T2}$  → via CP

## 2D Experiments

### CC experiments

hCC → CP DARR

hCC → CP DREAM

hCC → CP RFDR

hCC → CP Alfresco

hCOCA → CP BSH

hChhC → CP HHmixing

hCC → CP INEPT

CC → Direct INEPT

hCC → INEPT

### HC experiments

HC HETCOR → CP

HC HETCOR → INEPT

### NC experiments

hNhhC → CP HHmixing

hNCA → Double CP

hNCO → Double CP

hNCA → INEPT

hNCO → INEPT

hNcoCA → CP BSH

hNcoCA → INEPT

hNcaCO → CP BSH

hNcaCO → INEPT

## 3D Experiments

hCANCO → CP /CP /CP

hCONCA → CP /CP /CP

hNCACB → CP /CP /DREAM

hCONcaCB → CP /CP /CP /DREAM

hNCACO → CP /CP /BSH

hNCOCA → CP /CP /BSH

hNCOCX → CP /CP /DARR

hNCACX → CP /CP /DARR

hNCOCX → CP /CP /RFDR

hNCACX → CP /CP /RFDR

hCOCACB → CP /BSH /DREAM

## 4D Experiments

hCANCOCX → CP /CP /CP/DARR

hCONCACX → CP /CP /CP/DARR

hCONCACB → CP/CP/CP/DREAM

## Nitrogen detection

### Set user default parameters: D1 & RG

### Calibrations

#### Hard Pulse

15N Calibration based on hN CP experiment

15N Direct calibration

#### Cross Polarization

CP HN optimization

#### INEPT

hN

### 1D

HN → CP or INEPT

15N T1 → CP

15N T2 → CP

### 2D

HN HETCOR → CP or INEPT

hNN → CP PDSD

hNhhN → CP

### Listing S3 : Example of parameter file (“recap file”), which can be saved (and retrieved) from the ssNMRlib window

# System: Avance III HD 600 NMR spectrometer

MAS Probe used : B6292\_00230 (PH MASDVT 600S3 TL2 CNDH 1.3mm)

Probe diameter: 1.3 mm

Spinning rate: 55.006 (kHz)

Temperature : 258.0 (K) with Gas Flow measured : 1300.000000 (lph)

Topspin data location : /home/avallet/nmrsolids/2020-06-22\_PythonTest\_13mm/2

Sample id in sample database : 516

1Hcal Hard\_Pulse\_on\_1H : 3.28 (us) @ 2020-06-24 10:04:05

1H\_CPdefcal Hard\_Pulse\_for\_CP\_on\_1H : 3.28 (us) @ 2020-06-24 10:04:05

13Ccal Hard\_Pulse\_on\_13C : 2.85 (us) @ 2020-06-24 10:07:09

13C\_CPdefcal Hard\_Pulse\_for\_CP\_on\_13C : 2.85 (us) @ 2020-06-24 10:07:09

15Ncal Hard\_Pulse\_on\_15N : 3.40 (us) @ 2020-06-24 10:10:45

15N\_CPdefcal Hard\_Pulse\_for\_CP\_on\_15N : 3.40 (us) @ 2020-06-24 10:10:45

O1\_calibration O1p : 4560 (Hz) @ 2020-06-24 10:03:58

Water\_Suppression\_Delay D 30 : 0.15 (sec) @ 2020-06-24 10:11:07

RFfield\_for\_Water\_Suppression CNST 24 : 12 (kHz) @ 2020-06-24 10:11:07

CP\_HN\_BestRamp Ramp used: ramp90100.100 @ 2020-06-24 10:18:05

TargetField\_1H\_CP\_HN\_ramp90100\_cal CNST 42 : 84 (kHz) @ 2020-06-24 10:12:05

TargetField\_15N\_CP\_HN\_ramp90100\_cal CNST 52 : 35.001 (kHz) @ 2020-06-24 10:14:21

CP\_HN\_duration P 45 : 800 (us) @ 2020-06-24 10:16:35

CP\_HCA\_BestRamp Ramp used: ramp50100.100 @ 2020-06-24 10:23:45

CP\_HCA\_duration P 43 : 3000 (us) @ 2020-06-24 10:18:32

TargetField\_1H\_CP\_HCA\_ramp50100\_cal CNST 41 : 14.454545 (kHz) @ 2020-06-24 10:20:05

TargetField\_13C\_CP\_HCA\_ramp50100\_cal CNST 31 : 39.998 (kHz) @ 2020-06-24 10:22:25

CP\_HCO\_BestRamp Ramp used: ramp70100.100 @ 2020-06-24 10:28:26

TargetField\_1H\_CP\_HCO\_ramp70100\_cal CNST 41 : 84.000000 (kHz) @ 2020-06-24 10:23:58

CP\_HCO\_duration P 43 : 4750.000000 (us) @ 2020-06-24 10:25:35

TargetField\_13C\_CP\_HCO\_ramp70100\_cal CNST 31 : 35.002 (kHz) @ 2020-06-24 10:27:05

CP\_CN\_BestRamp Ramp used: ramp90100.100 @ 2020-06-24 10:33:00

TargetField\_15N\_CP\_CN\_ramp90100\_cal CNST 53 : 36.363636 (kHz) @ 2020-06-24 10:28:48

CP\_CN\_duration P 53 : 9368.421053 (us) @ 2020-06-24 10:30:02

TargetField\_13C\_CP\_CN\_ramp90100\_cal CNST 33 : 16.999 (kHz) @ 2020-06-24 10:31:31

CP\_NCA\_BestRamp Ramp used: ramp90100.100 @ 2020-06-24 10:39:14

TargetField\_15N\_CP\_NCA\_ramp90100\_cal CNST 54 : 38 (kHz) @ 2020-06-24 10:33:17

CP\_NCA\_duration P 35 : 9000.0 (us) @ 2020-06-24 10:35:09

TargetField\_13C\_CP\_NCA\_ramp90100\_cal CNST 34 : 15.362636 (kHz) @ 2020-06-24 10:37:28

INEPT\_delay\_HN D 14 : 0.001 (sec) @ 2020-06-24 10:42:08

INEPT\_delay\_HC D 13 : 0.001 (sec) @ 2020-06-24 10:43:35

INEPT\_delay\_NCO D 53 : 0.010 (sec) @ 2020-06-24 10:45:45

INEPT\_delay\_NCA D 54 : 0.01 (sec) @ 2020-06-24 10:47:27

TargetField\_BSH\_CP\_cal CNST 38 : 21.741217 (kHz) @ 2020-06-24 10:50:01

TargetField\_BSH\_CP\_duration\_cal P 38 : 4500 (us) @ 2020-06-24 10:51:52

DARR\_COCX\_duration D 5 : 0.2 (sec) @ 2020-06-24 10:54:02

CP\_DREAM\_duration P 17 : 5000 (us) @ 2020-06-24 10:56:05

TargetField\_DREAM CNST 7 : 6.103091 (kHz) @ 2020-06-24 10:57:58

RFDR\_COCX\_duration D 8 : 0.004 (sec) @ 2020-06-24 10:59:24

## Listing S4 : Security checks – How does it work?

Each pulse sequence within the solid-state NMRLib module is associated with a jython script named as “experiment\_p.py”. This script allows the user to define selectively which parameters will be verified for this specific experiment.

In order to perform the safety checks, the safety script will compare : the parameter value within the topspin experiment with the safety table adapted by the user for his probes.

This safety table, so-called “Security\_table\_SSNMRLib.txt”, is located in : “/NMRLib/py” and contains all the maximum values authorized for each probe.

An extract of this file is shown below.

| SIZE | PULSE_TYPE | ELEMENT | DEFINITION    | CNST_NAME | MAX_kHz | PULSE | DURATION | UNIT | SPNAM | MIDPOINT_RAMP | SEQ_DETECTION |
|------|------------|---------|---------------|-----------|---------|-------|----------|------|-------|---------------|---------------|
| 0.7  | HP         | 1H      | 1H_HP         | -         | -       | P1    | 15       | us   | -     | -             | 1H            |
| 0.7  | HP         | 1H      | 1H_HP         | -         | -       | P2    | 15       | us   | -     | -             | 13C           |
| 0.7  | HP         | 1H      | 1H_HP         | -         | -       | P2    | 15       | us   | -     | -             | 15N           |
| 0.7  | HP         | 13C     | 13C_HP        | -         | -       | P1    | 15       | us   | -     | -             | 13C           |
| 0.7  | HP         | 13C     | 13C_HP        | -         | -       | P2    | 15       | us   | -     | -             | 1H            |
| 0.7  | HP         | 13C     | 13C_HP        | -         | -       | P3    | 15       | us   | -     | -             | 15N           |
| 0.7  | HP         | 15N     | 15N_HP        | -         | -       | P1    | 15       | us   | -     | -             | 15N           |
| 0.7  | HP         | 15N     | 15N_HP        | -         | -       | P3    | 15       | us   | -     | -             | 13C           |
| 0.7  | HP         | 15N     | 15N_HP        | -         | -       | P3    | 15       | us   | -     | -             | 1H            |
| 0.7  | HP         | 2H      | 2H_HP         | -         | -       | P4    | 25       | us   | -     | -             | 1H            |
| 0.7  | HP         | 2H      | 2H_HP         | -         | -       | P4    | 25       | us   | -     | -             | 13C           |
| 0.7  | HP         | 2H      | 2H_HP         | -         | -       | P4    | 25       | us   | -     | -             | 15N           |
| 0.7  | HP         | 13C     | 13C_HP_for_CP | -         | -       | P21   | 5        | us   | -     | -             | 1H            |
| 0.7  | HP         | 13C     | 13C_HP_for_CP | -         | -       | P21   | 5        | us   | -     | -             | 13C           |
| 0.7  | HP         | 13C     | 13C_HP_for_CP | -         | -       | P21   | 5        | us   | -     | -             | 15N           |
| 0.7  | HP         | 1H      | 1H_HP_for_CP  | -         | -       | P22   | 4        | us   | -     | -             | 1H            |
| 0.7  | HP         | 1H      | 1H_HP_for_CP  | -         | -       | P22   | 4        | us   | -     | -             | 13C           |
| 0.7  | HP         | 1H      | 1H_HP_for_CP  | -         | -       | P22   | 4        | us   | -     | -             | 15N           |
| 0.7  | HP         | 15N     | 15N_HP_for_CP | -         | -       | P23   | 6        | us   | -     | -             | 1H            |
| 0.7  | HP         | 15N     | 15N_HP_for_CP | -         | -       | P23   | 6        | us   | -     | -             | 13C           |
| 0.7  | HP         | 15N     | 15N_HP_for_CP | -         | -       | P23   | 6        | us   | -     | -             | 15N           |
| 0.7  | HP         | 2H      | 2H_HP_for_CP  | -         | -       | P24   | 25       | us   | -     | -             | 1H            |
| 0.7  | HP         | 2H      | 2H_HP_for_CP  | -         | -       | P24   | 25       | us   | -     | -             | 13C           |
| 0.7  | HP         | 2H      | 2H_HP_for_CP  | -         | -       | P24   | 25       | us   | -     | -             | 15N           |
| 0.7  | CP         | HN      | RF_Field_1H   | CNST42    | 190     | P45   | 6000     | us   | 42    | 62            | -             |
| 0.7  | CP         | HN      | RF_Field_15N  | CNST52    | 55      | P45   | 6000     | us   | -     | -             | -             |
| 0.7  | CP         | HC      | RF_Field_13C  | CNST31    | 70      | P43   | 6000     | us   | -     | -             | -             |
| 0.7  | CP         | HC      | RF_Field_1H   | CNST41    | 190     | P43   | 6000     | us   | 41    | 61            | -             |
| 0.7  | CP         | HCA     | RF_Field_13C  | CNST31    | 70      | P43   | 6000     | us   | -     | -             | -             |
| 0.7  | CP         | HCA     | RF_Field_1H   | CNST41    | 190     | P43   | 6000     | us   | 41    | 61            | -             |
| 0.7  | CP         | HCO     | RF_Field_13C  | CNST31    | 70      | P43   | 6000     | us   | -     | -             | -             |
| 0.7  | CP         | HCO     | RF_Field_1H   | CNST41    | 190     | P43   | 6000     | us   | 41    | 61            | -             |
| 0.7  | CP         | HACA    | RF_Field_13CA | CNST35    | 70      | P34   | 7000     | us   | -     | -             | -             |
| 0.7  | CP         | HACA    | RF_Field_1HA  | CNST45    | 190     | P34   | 7000     | us   | 45    | 57            | -             |
| 0.7  | CP         | NC0     | RF_Field_13CO | CNST33    | 70      | P53   | 10000    | us   | -     | -             | -             |
| 0.7  | CP         | NC0     | RF_Field_15N  | CNST53    | 55      | P53   | 10000    | us   | 53    | 63            | -             |
| 0.7  | CP         | NCA     | RF_Field_13CA | CNST34    | 70      | P35   | 10000    | us   | -     | -             | -             |
| 0.7  | CP         | NCA     | RF_Field_15N  | CNST54    | 55      | P35   | 10000    | us   | 54    | 60            | -             |
| 0.7  | CP         | sim_HCN | RF_Field_13C  | CNST31    | 70      | P43   | 6000     | us   | -     | -             | -             |
| 0.7  | CP         | sim_HCN | RF_Field_1H   | CNST41    | 190     | P43   | 6000     | us   | 41    | 61            | -             |
| 0.7  | CP         | sim_HCN | RF_Field_15N  | CNST51    | 55      | P43   | 6000     | us   | -     | -             | -             |

The security check is automatically performed when an experiment is loaded from NMRLib. Moreover, if the user wants to change a parameter inside topspin, a “security button” can be hit, at any time, in order to re-do all the checks.

If a problem appears, a pop-up is generated showing the actual problematic topspin value and the specification in order to alert the user. This warning is also written in the topspin terminal.

```
##### Security checking #####
PULSE PROGRAM : av_hNH_cp_cp_miss.IBS
Security table : /home/avallet/NMRLib/py/Security_table_SSNMRLib.txt
P21, P22, P23 & P24 are used for the power calculation
Hard Pulse P1 for the nucleus 1H: 2.75 us, spec: 15.00 us: Ok.
Hard Pulse P2 for the nucleus 13C: 2.93 us, spec: 15.00 us: Ok.
Hard Pulse P3 for the nucleus 15N: 3.80 us, spec: 15.00 us: Ok.
Hard Pulse P21 for the nucleus 13C: 2.93 us, spec: 6.00 us: Ok.
Hard Pulse P22 for the nucleus 1H: 2.75 us, spec: 5.00 us: Ok.
Hard Pulse P23 for the nucleus 15N: 3.80 us, spec: 7.00 us: Ok.
D1 : 0.89 sec, spec: 0.60 sec: Ok
CP HN CNST 42: 15.00 kHz, spec: 120.00 kHz: Ok
CP HN duration P 45: 1000.00 us, spec: 6000.00 us: Ok
CP HN SPNAM 42 ramp50100.100 : max RF on CNST 42: 18.75 kHz, max spec: 120.00 kHz : Ok
WARNING CP HN CNST 52: 51.00 kHz, spec: 50.00 kHz
Water suppression CNST24: 10.00 kHz, spec: 30.00 kHz: Ok
CP duration D30 for water suppression: 0.16 sec, spec: 0.20 sec: Ok
Decoupling CNST 12: 10.00 kHz, Max spec: 120.00 kHz: Ok
CNST 12: Decoupling time during indirect dimension F 1: 0.0263 sec, Max spec: 0.0300 sec: Ok
Decoupling CNST 13: 5.00 kHz, Max spec: 30.00 kHz: Ok
Decoupling on CNST 13 during the acquisition: 0.0150 sec, Max spec: 0.0300 sec: Ok
```

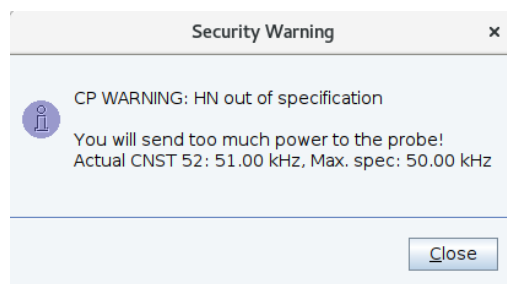

In this way, each pulse sequence has its own personalized security which is adapted for its use and to the probe specification :

For each pulse sequence :

- All the parameters (water suppression elements, pulse, duration & RF power) within the pulse sequence are checked according to the probe.
- In a ramped RF shape, for CP or DREAM/BSH, the maximum value of the ramp is taken into account. To this end, the maximum value in the shape file is extracted, and the corresponding kHz value is calculated.
- The safety check verifies that midpoint of the ramp that is stored in a constant (e.g.  $\text{cnst62} = 95$  for a 90-to-100 ramp) and used for calculating the power level of the ramp, is indeed the mean of that ramp. This is done by explicitly verifying the ramp in the shape file.
- In CP experiments, the values of the two corresponding RF fields is checked. If the values are too far from Hartmann-Hahn conditions a popup window informs the user. This may point to mis-calibration of the reference pulses, as the CP power levels are calculated from them.
- If a list is used in the pulse sequence (e.g. the spin-lock duration in an  $R_{1\rho}$  experiment), the safety check retrieves all the values within this list and determines the maximal value. This ensures that all values are within the safety limits.
- If an element is repeated multiple times, the safety check will verify the total duration, i.e. the duration of the unit element times the number of repeats.
- The decoupling times are retrieved automatically for the whole direct and indirect dimensions, i.e. the maximum evolution time ( $t_{1\text{max}}$ ) is considered.

In addition, for the calibrations :

- As the parameter optimization array is define within the python script, negative values are automatically discarded.
- In a parameter optimization, the safety check verifies that none of the experiments of the array exceeds the allowed safety limits.
- Clicking the button of a calibration experiment generally starts the acquisition automatically. However, if a safety problem is detected, the calibration is not launched automatically.



## Listing S4 : Security checks – How does it work?

Each pulse sequence within the solid-state NMRlib module is associated with a jython script named as “experiment\_p.py”. This script allows the user to define selectively which parameters will be verified for this specific experiment.

In order to perform the safety checks, the safety script will compare : the parameter value within the topspin experiment with the safety table adapted by the user for his probes.

This safety table, so-called “Security\_table\_SSNMRlib.txt”, is located in : “/NMRlib/py” and contains all the maximum values authorized for each probe.

An extract of this file is shown below.

| SIZE | PULSE_TYPE | ELEMENT | DEFINITION    | CNST_NAME | MAX_kHz | PULSE | DURATION | UNIT | SPNAM | MIDPOINT_RAMP | SEQ_DETECTION |
|------|------------|---------|---------------|-----------|---------|-------|----------|------|-------|---------------|---------------|
| 0.7  | HP         | 1H      | 1H HP         | -         | -       | P1    | 15       | us   | -     | -             | 1H            |
| 0.7  | HP         | 1H      | 1H HP         | -         | -       | P2    | 15       | us   | -     | -             | 13C           |
| 0.7  | HP         | 1H      | 1H HP         | -         | -       | P2    | 15       | us   | -     | -             | 15N           |
| 0.7  | HP         | 13C     | 13C HP        | -         | -       | P1    | 15       | us   | -     | -             | 13C           |
| 0.7  | HP         | 13C     | 13C HP        | -         | -       | P2    | 15       | us   | -     | -             | 1H            |
| 0.7  | HP         | 13C     | 13C HP        | -         | -       | P3    | 15       | us   | -     | -             | 15N           |
| 0.7  | HP         | 15N     | 15N HP        | -         | -       | P1    | 15       | us   | -     | -             | 15N           |
| 0.7  | HP         | 15N     | 15N HP        | -         | -       | P3    | 15       | us   | -     | -             | 13C           |
| 0.7  | HP         | 15N     | 15N HP        | -         | -       | P3    | 15       | us   | -     | -             | 1H            |
| 0.7  | HP         | 2H      | 2H HP         | -         | -       | P4    | 25       | us   | -     | -             | 1H            |
| 0.7  | HP         | 2H      | 2H HP         | -         | -       | P4    | 25       | us   | -     | -             | 13C           |
| 0.7  | HP         | 2H      | 2H HP         | -         | -       | P4    | 25       | us   | -     | -             | 15N           |
| 0.7  | HP         | 13C     | 13C HP_for_CP | -         | -       | P21   | 5        | us   | -     | -             | 1H            |
| 0.7  | HP         | 13C     | 13C HP_for_CP | -         | -       | P21   | 5        | us   | -     | -             | 13C           |
| 0.7  | HP         | 13C     | 13C HP_for_CP | -         | -       | P21   | 5        | us   | -     | -             | 15N           |
| 0.7  | HP         | 1H      | 1H HP_for_CP  | -         | -       | P22   | 4        | us   | -     | -             | 1H            |
| 0.7  | HP         | 1H      | 1H HP_for_CP  | -         | -       | P22   | 4        | us   | -     | -             | 13C           |
| 0.7  | HP         | 1H      | 1H HP_for_CP  | -         | -       | P22   | 4        | us   | -     | -             | 15N           |
| 0.7  | HP         | 15N     | 15N HP_for_CP | -         | -       | P23   | 6        | us   | -     | -             | 1H            |
| 0.7  | HP         | 15N     | 15N HP_for_CP | -         | -       | P23   | 6        | us   | -     | -             | 13C           |
| 0.7  | HP         | 15N     | 15N HP_for_CP | -         | -       | P23   | 6        | us   | -     | -             | 15N           |
| 0.7  | HP         | 2H      | 2H HP_for_CP  | -         | -       | P24   | 25       | us   | -     | -             | 1H            |
| 0.7  | HP         | 2H      | 2H HP_for_CP  | -         | -       | P24   | 25       | us   | -     | -             | 13C           |
| 0.7  | HP         | 2H      | 2H HP_for_CP  | -         | -       | P24   | 25       | us   | -     | -             | 15N           |
| 0.7  | CP         | HN      | RF_Field_1H   | CNST42    | 190     | P45   | 6000     | us   | 42    | 62            | -             |
| 0.7  | CP         | HN      | RF_Field_15N  | CNST52    | 55      | P45   | 6000     | us   | -     | -             | -             |
| 0.7  | CP         | HC      | RF_Field_13C  | CNST31    | 70      | P43   | 6000     | us   | -     | -             | -             |
| 0.7  | CP         | HC      | RF_Field_1H   | CNST41    | 190     | P43   | 6000     | us   | 41    | 61            | -             |
| 0.7  | CP         | HCA     | RF_Field_13C  | CNST31    | 70      | P43   | 6000     | us   | -     | -             | -             |
| 0.7  | CP         | HCA     | RF_Field_1H   | CNST41    | 190     | P43   | 6000     | us   | 41    | 61            | -             |
| 0.7  | CP         | HCO     | RF_Field_13C  | CNST31    | 70      | P43   | 6000     | us   | -     | -             | -             |
| 0.7  | CP         | HCO     | RF_Field_1H   | CNST41    | 190     | P43   | 6000     | us   | 41    | 61            | -             |
| 0.7  | CP         | HACA    | RF_Field_13CA | CNST35    | 70      | P34   | 7000     | us   | -     | -             | -             |
| 0.7  | CP         | HACA    | RF_Field_1HA  | CNST45    | 190     | P34   | 7000     | us   | 45    | 57            | -             |
| 0.7  | CP         | NC0     | RF_Field_13CO | CNST33    | 70      | P53   | 10000    | us   | -     | -             | -             |
| 0.7  | CP         | NC0     | RF_Field_15N  | CNST53    | 55      | P53   | 10000    | us   | 53    | 63            | -             |
| 0.7  | CP         | NCA     | RF_Field_13CA | CNST34    | 70      | P35   | 10000    | us   | -     | -             | -             |
| 0.7  | CP         | NCA     | RF_Field_15N  | CNST54    | 55      | P35   | 10000    | us   | 54    | 60            | -             |
| 0.7  | CP         | sim_HCN | RF_Field_13C  | CNST31    | 70      | P43   | 6000     | us   | -     | -             | -             |
| 0.7  | CP         | sim_HCN | RF_Field_1H   | CNST41    | 190     | P43   | 6000     | us   | 41    | 61            | -             |
| 0.7  | CP         | sim_HCN | RF_Field_15N  | CNST51    | 55      | P43   | 6000     | us   | -     | -             | -             |

The security check is automatically performed when an experiment is loaded from NMRlib. Moreover, if the user wants to change a parameter inside topspin, a “security button” can be hit, at any time, in order to re-do all the checks.

If a problem appears, a pop-up is generated showing the actual problematic topspin value and the specification in order to alert the user. This warning is also written in the topspin terminal.

```
##### Security checking #####
PULSE PROGRAM : av_hNH_cp_cp_miss.IBS
Security table : /home/avallet/NMRlib/py/Security_table_SSNMRlib.txt
P21, P22, P23 & P24 are used for the power calculation
Hard Pulse P1 for the nucleus 1H: 2.75 us, spec: 15.00 us: Ok.
Hard Pulse P2 for the nucleus 13C: 2.93 us, spec: 15.00 us: Ok.
Hard Pulse P3 for the nucleus 15N: 3.80 us, spec: 15.00 us: Ok.
Hard Pulse P21 for the nucleus 13C: 2.93 us, spec: 6.00 us: Ok.
Hard Pulse P22 for the nucleus 1H: 2.75 us, spec: 5.00 us: Ok.
Hard Pulse P23 for the nucleus 15N: 3.80 us, spec: 7.00 us: Ok.
D1 : 0.89 sec, spec: 0.60 sec: Ok
CP HN CNST 42: 15.00 kHz, spec: 120.00 kHz: Ok
CP HN duration P 45: 1000.00 us, spec: 6000.00 us: Ok
CP HN SPNAM 42 ramp50100.100 : max RF on CNST 42: 18.75 kHz, max spec: 120.00 kHz : Ok
WARNING CP HN CNST 52: 51.00 kHz, spec: 50.00 kHz
Water suppression CNST24: 10.00 kHz, spec: 30.00 kHz: Ok
CP duration D30 for water suppression: 0.16 sec, spec: 0.20 sec: Ok
Decoupling CNST 12: 10.00 kHz, Max spec: 120.00 kHz: Ok
CNST 12: Decoupling time during indirect dimension F 1: 0.0263 sec, Max spec: 0.0300 sec: Ok
Decoupling CNST 13: 5.00 kHz, Max spec: 30.00 kHz: Ok
Decoupling on CNST 13 during the acquisition: 0.0150 sec, Max spec: 0.0300 sec: Ok
```



In this way, each pulse sequence has its own personalized security which is adapted for its use and to the probe specification :

For each pulse sequence :

- All the parameters (water suppression elements, pulse, duration & RF power) within the pulse sequence are checked according to the probe.
- In a ramped RF shape, for CP or DREAM/BSH, the maximum value of the ramp is taken into account. To this end, the maximum value in the shape file is extracted, and the corresponding kHz value is calculated.
- The safety check verifies that midpoint of the ramp that is stored in a constant (e.g.  $\text{cnst62} = 95$  for a 90-to-100 ramp) and used for calculating the power level of the ramp, is indeed the mean of that ramp. This is done by explicitly verifying the ramp in the shape file.
- In CP experiments, the values of the two corresponding RF fields is checked. If the values are too far from Hartmann-Hahn conditions a popup window informs the user. This may point to mis-calibration of the reference pulses, as the CP power levels are calculated from them.
- If a list is used in the pulse sequence (e.g. the spin-lock duration in an  $R_{1\rho}$  experiment), the safety check retrieves all the values within this list and determines the maximal value. This ensures that all values are within the safety limits.
- If an element is repeated multiple times, the safety check will verify the total duration, i.e. the duration of the unit element times the number of repeats.
- The decoupling times are retrieved automatically for the whole direct and indirect dimensions, i.e. the maximum evolution time ( $t_{1\text{max}}$ ) is considered.

In addition, for the calibrations :

- As the parameter optimization array is define within the python script, negative values are automatically discarded.
- In a parameter optimization, the safety check verifies that none of the experiments of the array exceeds the allowed safety limits.
- Clicking the button of a calibration experiment generally starts the acquisition automatically. However, if a safety problem is detected, the calibration is not launched automatically.

## Listing S5 : Adding an experiment in NMRLib

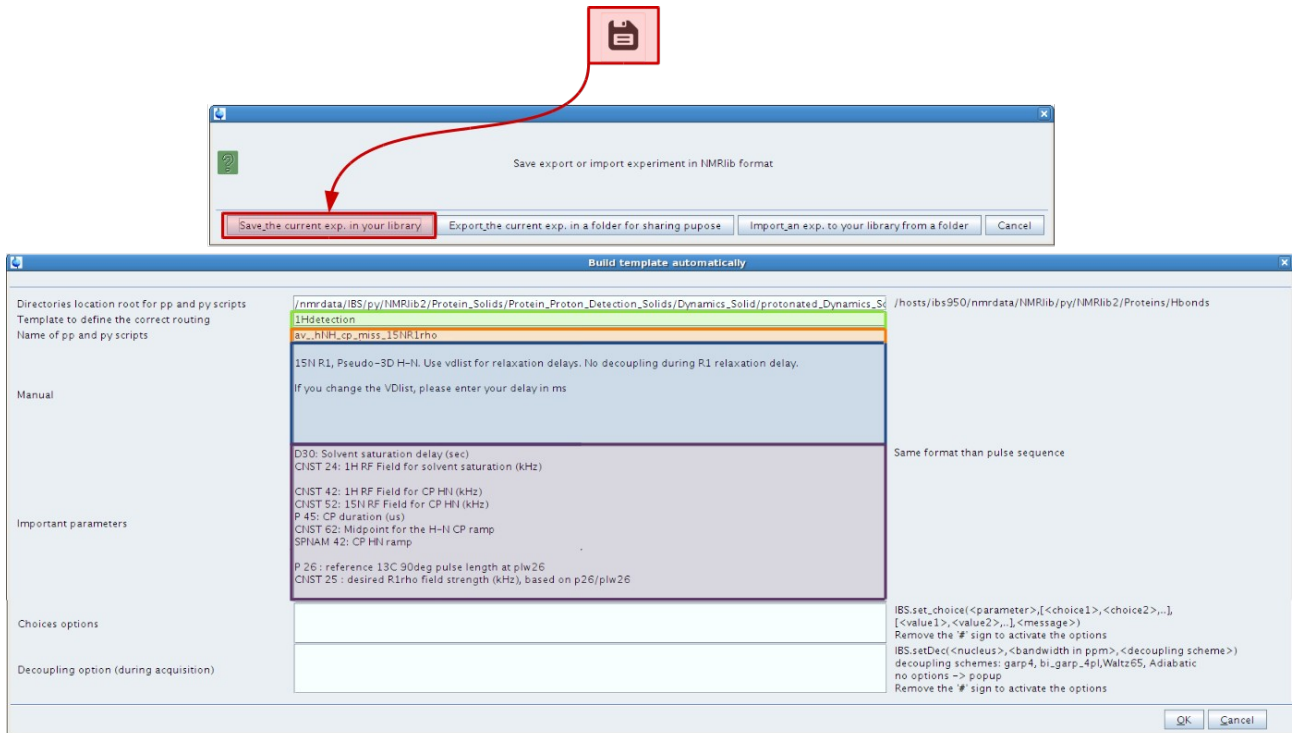

### Routing file :

if 1H detection experiment -> 1Hdetection  
 if 13C detection experiment -> hCONCaCx4D  
 if 15N detection experiment -> 15Ndetection

### Experiment name

#### Comments :

Experiment name, reference

### Important parameters :

Parameters that can be popup for checking during the set-up of the experiment
